# Supplementary material
Source: MDPI journal article supplement (https://www.mdpi.com/2073-4344/9/5/476)
Supplement: s1 [file s1]

# Supplementary Materials: Tuning Sn-Cu Catalysis for Electrochemical Reduction of CO<sub>2</sub> on Partially Reduced Oxides SnO<sub>x</sub>-CuO<sub>x</sub>-Modified Cu Electrodes

Qianwen Li, Mei Li, Shengbo Zhang, Xiao Liu\*, Xinli Zhu, Qingfeng Ge and Hua Wang\*

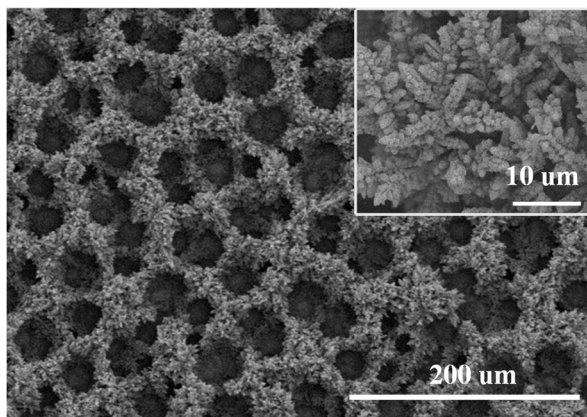

Figure S1. The SEM image of Cu foam.

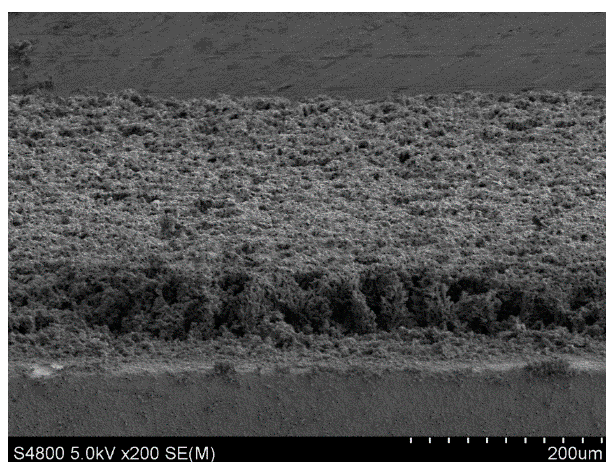

Figure S2. The cross-sectional views of Cu/SnO<sub>2</sub>.

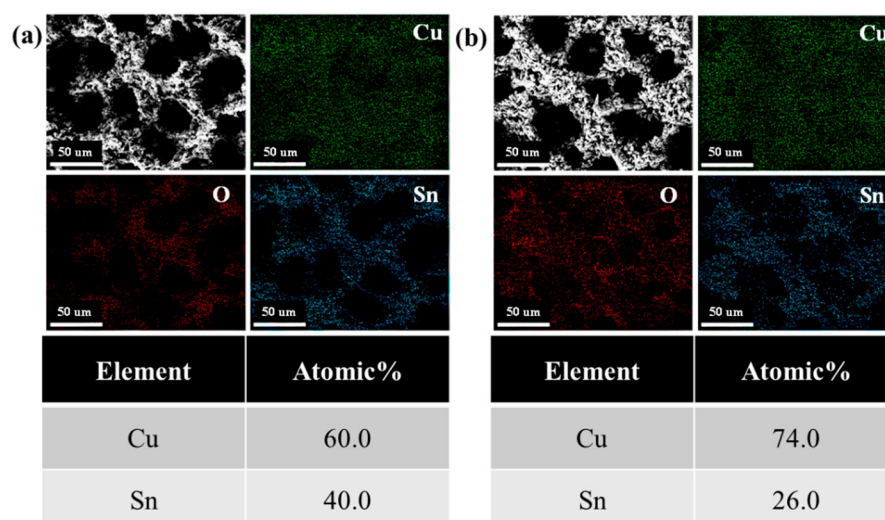

**Figure S3.** SEM elemental mapping for (a) Cu/SnO<sub>2</sub> and (b) A-Cu/SnO<sub>2</sub> before pre-reduction. The table is EDX analysis identifying.

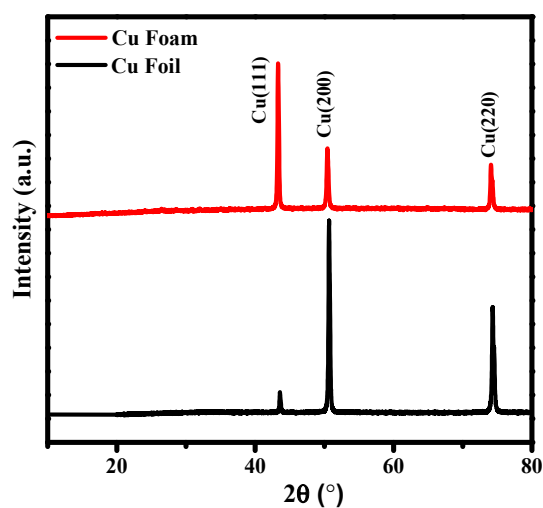

**Figure S4.** XRD patterns of Cu Foil and Cu foam.

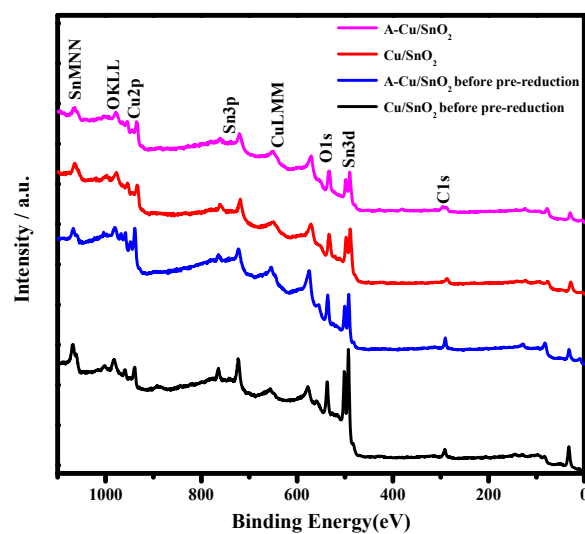

**Figure S5.** XPS survey spectra of Cu/SnO<sub>2</sub>, A-Cu/SnO<sub>2</sub> before and after pre-reduction.

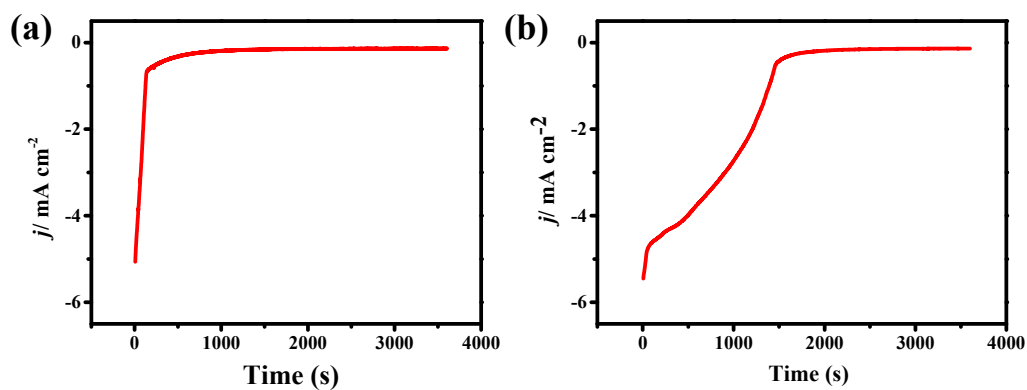

**Figure S6.** The I-t curves of pre-reduction of for (a) Cu/SnO<sub>2</sub> and (b) A-Cu/SnO<sub>2</sub> at -0.5 V vs. RHE in 0.1M KHCO<sub>3</sub> purged with CO<sub>2</sub> gas.

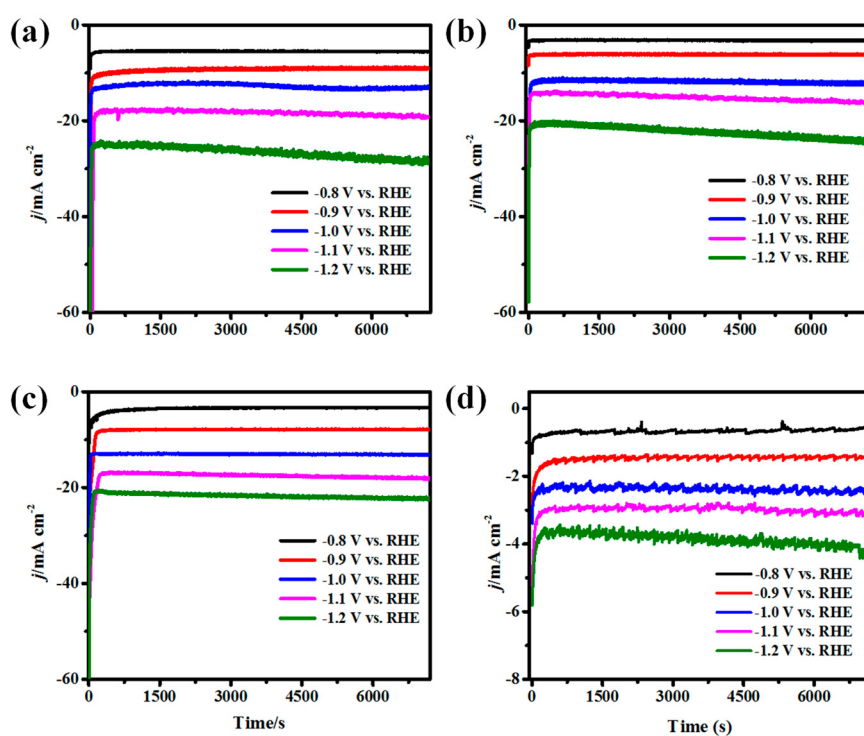

**Figure S7.** The I-t curves during CO<sub>2</sub> electroreduction of (a) Cu foam, (b) Cu/SnO<sub>2</sub>, (c) A-Cu/SnO<sub>2</sub>, (d) Sn plate at different voltages in 0.1 M KHCO<sub>3</sub> purged with CO<sub>2</sub> gas.

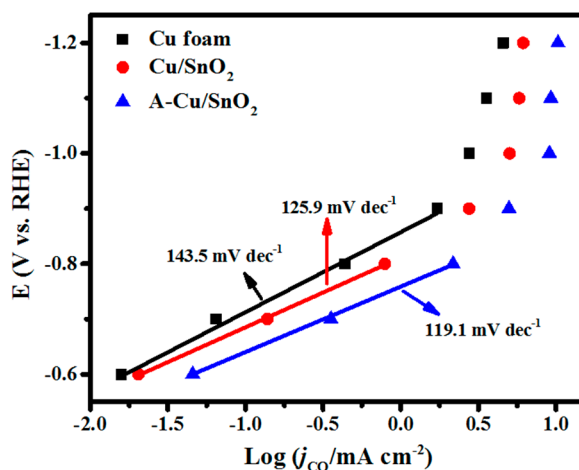

**Figure S8.** CO partial current density Tafel plots for Cu foam, Cu/SnO<sub>2</sub> and A-Cu/SnO<sub>2</sub>.

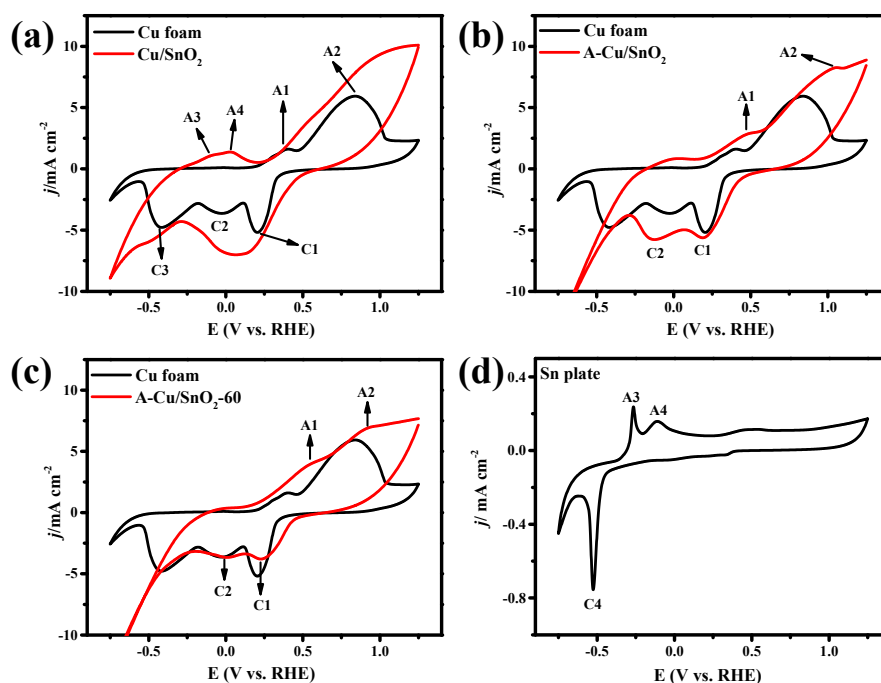

**Figure S9.** CV curves of Cu foam and (a) Cu/SnO<sub>2</sub>, (b) A-Cu/SnO<sub>2</sub>, (c) A-Cu/SnO<sub>2</sub>-60 (SnO<sub>2</sub> deposition time: 60 min) and (d) Sn plate in N<sub>2</sub>-saturated 0.1 M KHCO<sub>3</sub> solution, scan rate = 10 mV/s.

The surface redox potentials of the electrodes were studied by CVs from  $-0.75$  to  $+1.25$  V vs RHE in the N<sub>2</sub>-saturated 0.1 M KHCO<sub>3</sub> (Figure S7). Cu foam shows two anodic peak at  $-0.39$  V and  $-0.83$  V vs RHE due to the oxidation of Cu to Cu<sub>2</sub>O and CuO, and the three cathodic peaks are attributed to CuO reduction to Cu<sub>2</sub>O ( $0.19$  V), Cu<sub>2</sub>O reduction to Cu ( $-0.04$  V) and HCuO<sub>2</sub><sup>−</sup> reduction ( $-0.42$  V) [1]. HCuO<sub>2</sub><sup>−</sup> could be observed when the most positive limit of the potential scan is high enough [2]. As shown in Figure S6(d) is CV of Sn plate, Two anodic peaks correspond to the oxidation of Sn to SnO ( $-0.26$  V) and SnO to SnO<sub>2</sub> ( $-0.11$  V) and the cathodic peak which involves a larger peak current than two anodic peaks are from the combination of two processes: reduction of SnO<sub>2</sub> to SnO and also the reduction of SnO to Sn ( $-0.52$  V) [3]. For Cu/SnO<sub>2</sub>, the apparent anodic peak at  $-0.1$  V correspond to the oxidation of Sn to SnO<sub>2</sub>, and the peaks correspond to the oxidation of Cu to CuO was not observed. However, for A-Cu/SnO<sub>2</sub>,

the redox feature of Sn is much reduced and of Cu is observed. It indicated Cu atoms diffuse out and replace the  $\text{SnO}_2$  surface [3]. In addition, when  $\text{SnO}_2$  deposition time was prolonged to 60 min, the redox feature of Cu was still observable but reduced, attesting to Cu atoms exposed to electrode decreased with the increase of  $\text{SnO}_2$  amount.

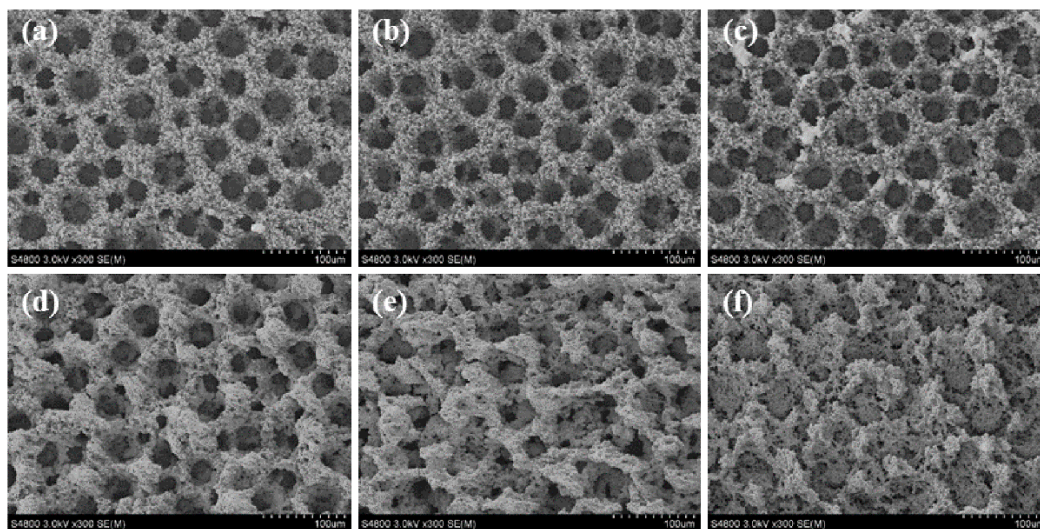

**Figure S10.** The SEM images of Cu/ $\text{SnO}_2$  with different  $\text{SnO}_2$  deposition time, (a) 0 min, (b) 5 min, (c) 15 min, (d) 30 min, (e) 45 min, (f) 60 min.

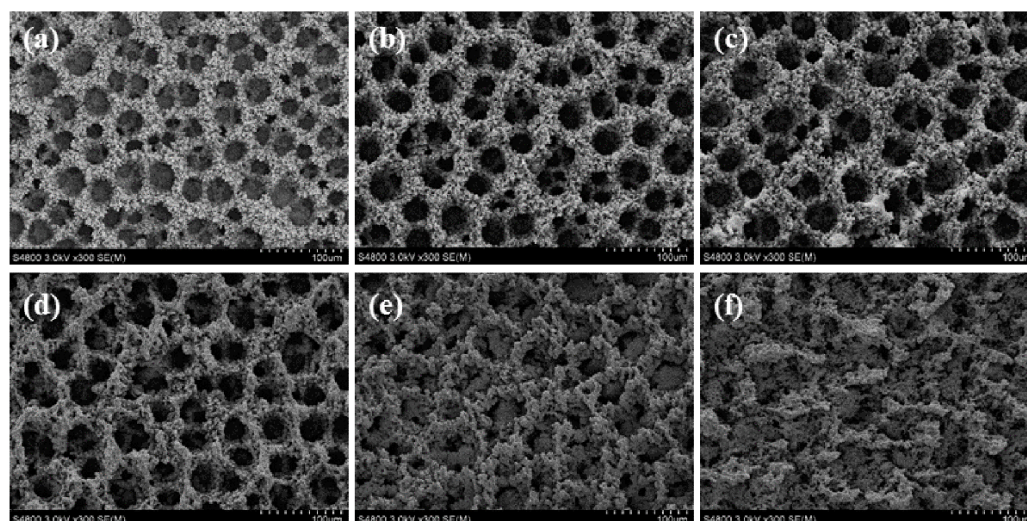

**Figure S11.** The SEM images of A-Cu/ $\text{SnO}_2$  with different  $\text{SnO}_2$  deposition time, (a) 0 min, (b) 5 min, (c) 15 min, (d) 30 min, (e) 45 min, (f) 60 min.

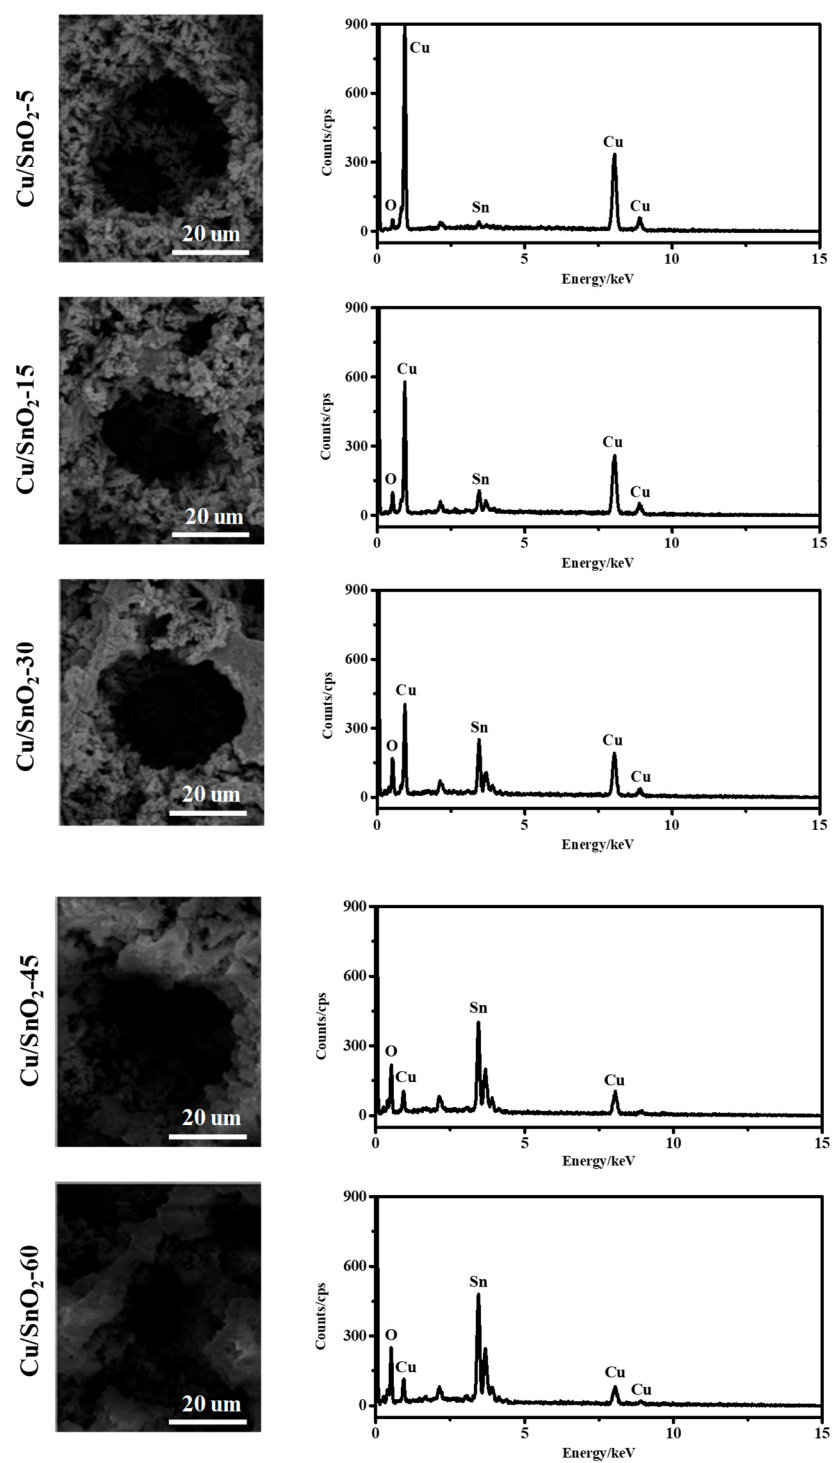

Figure S12. The EDS spectra of Cu/SnO<sub>2</sub>-T (T represents the deposition time of SnO<sub>2</sub>).

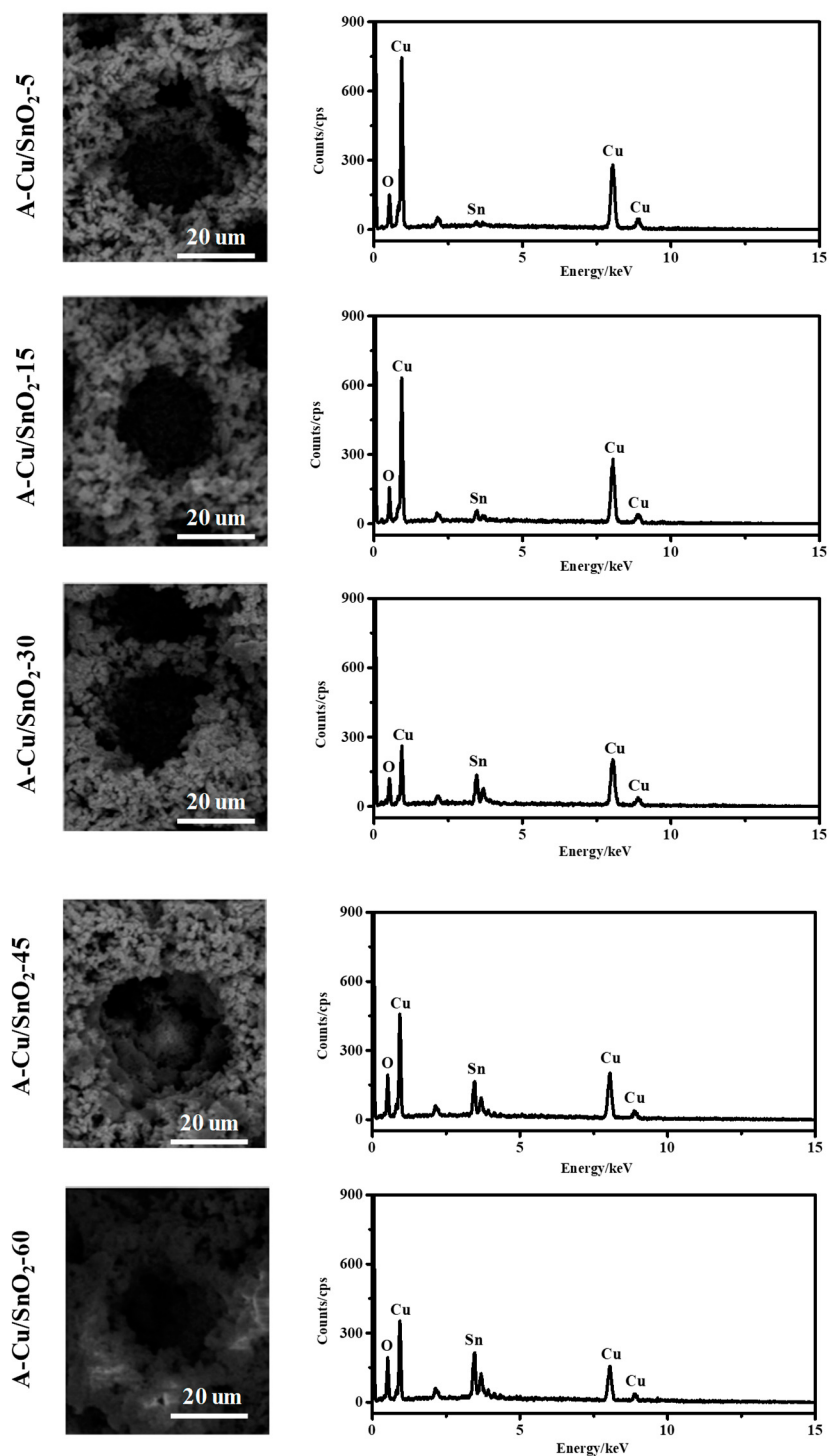

**Figure S13.** The EDS spectra of A-Cu/SnO<sub>2</sub>-T (T represents the deposition time of SnO<sub>2</sub>).

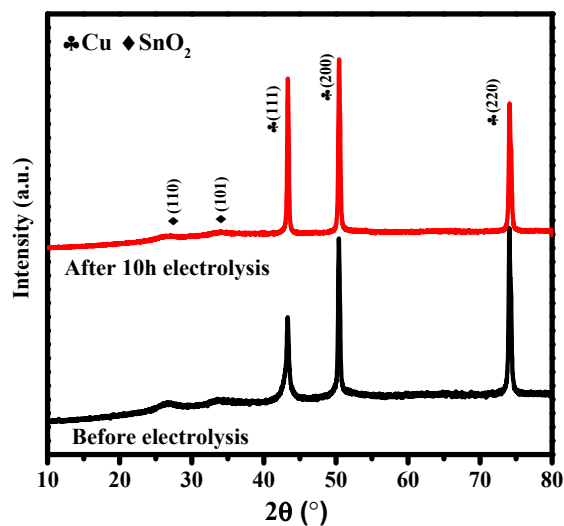

**Figure S14.** XRD patterns of A-Cu/SnO<sub>2</sub> before and after 10 h of CO<sub>2</sub> reduction -1.0 V vs RHE in CO<sub>2</sub>-saturated 0.1 M KHCO<sub>3</sub> solution.

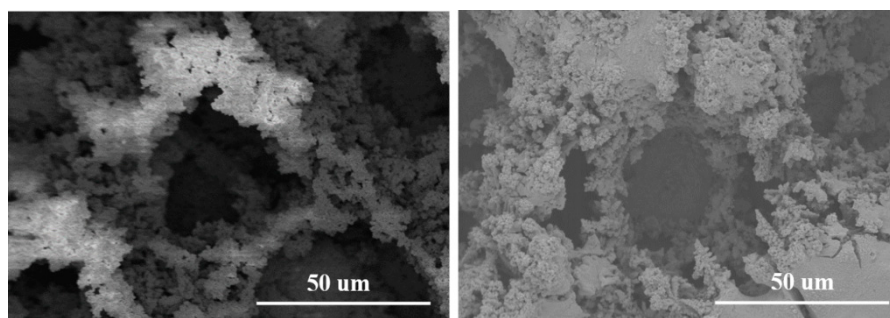

**Figure S15.** SEM images of (a) A-Cu/SnO<sub>2</sub> before CO<sub>2</sub> reduction, (b) A-Cu/SnO<sub>2</sub> after CO<sub>2</sub> reduction for 10 h at -1.0 V vs RHE.

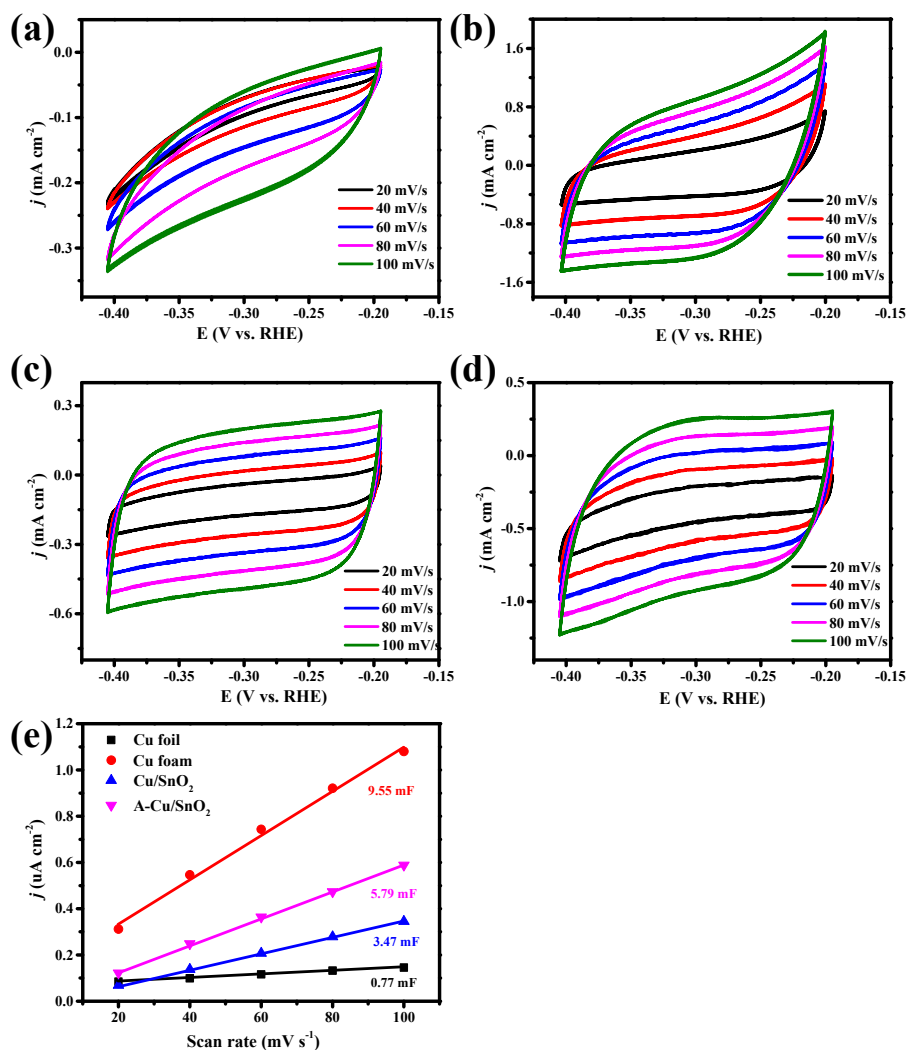

**Figure S16.** Double layer capacitance ( $C_{dl}$ ) obtained from CV measurements. CV curves of (a) Cu foil, (b) Cu foam, (c) Cu/SnO<sub>2</sub>, (d) A-Cu/SnO<sub>2</sub> in CO<sub>2</sub> saturated 0.1 M KHCO<sub>3</sub> electrolyte between -0.2 V and -0.4 V vs RHE. (e) Current density difference between cathodic and anodic sweeps at -0.3 V vs RHE against scan rate (20 mV s<sup>-1</sup> to 40 mV s<sup>-1</sup>). The  $C_{dl}$  was calculated by plotting the  $\Delta j/2$  against scan rates, in which the slope was  $C_{dl}$ . The  $\Delta j$  is the difference between  $j_a$  and  $j_c$ , where  $j_a$  and  $j_c$  are the anodic and cathodic current density at the midpoint of applied potential range, respectively [4].

The electrochemical surface area (ECSA) of the catalyst can be determined by Equation (1).

$$ECSA = R_f S \quad (1)$$

Where  $S$  is the geometric area of the smooth metal electrode,  $R_f$  is the roughness factor, which is calculated from the ratio  $C_{dl}$  for the working electrode and the corresponding smooth metal electrode. Therefore, the ECSAs of Cu foam, Cu/SnO<sub>2</sub> and A-Cu/SnO<sub>2</sub> are calculated to be 12.4 cm<sup>2</sup>, 4.5 cm<sup>2</sup> and 7.5 cm<sup>2</sup>, respectively. It indicates that the introduction of SnO<sub>2</sub> reduces the ECSA and the annealing treatment increases the ECSA, which affects the steady-state current density of electrodes (Figure S13).

**Table S1.** The content of Cu and Sn of Cu/SnO<sub>2</sub> and A-Cu/SnO<sub>2</sub> obtained from ICP-AES.

| Catalysts             | Cu (wt%) | Sn (wt%) |
|-----------------------|----------|----------|
| Cu/SnO <sub>2</sub>   | 56.54    | 1.79     |
| A-Cu/SnO <sub>2</sub> | 59.19    | 1.88     |

The inductively coupled atomic emission spectroscopy (ICP-AES) were taken using a Varian VISTA-MPX equipped with a charge coupled device (CCD) detector. Samples were dissolved in aqua regia (the volume ratio of concentrated HNO<sub>3</sub> to concentrated HCl is 1:3). Then samples were diluted with deionized water and adjusted pH to 5~6 with 0.1 M NaOH aqueous solution prior to measurements. Cu standard solution (100 ppm) and Sn standard solution (100 ppm) were used and diluted for calibration measurement.

**Table S2.** Summary of atomic percent of Cu/SnO<sub>2</sub> and A-Cu/SnO<sub>2</sub> before and after pre-reduction obtained from XPS and SEM-EDX elemental mapping.

| Samples                                       |    | XPS  | SEM-EDX |
|-----------------------------------------------|----|------|---------|
| Cu/SnO <sub>2</sub> before<br>pre-reduction   | Cu | 10.1 | 47.3    |
|                                               | Sn | 32.1 | 31.5    |
|                                               | O  | 57.8 | 21.2    |
| Cu/SnO <sub>2</sub>                           | Cu | 17.1 | 57.9    |
|                                               | Sn | 23.8 | 27.7    |
|                                               | O  | 59.1 | 14.4    |
| A-Cu/SnO <sub>2</sub> before<br>pre-reduction | Cu | 25.8 | 59.0    |
|                                               | Sn | 18.5 | 20.7    |
|                                               | O  | 55.7 | 20.3    |
| A-Cu/SnO <sub>2</sub>                         | Cu | 26.0 | 74.1    |
|                                               | Sn | 10.1 | 18.6    |
|                                               | O  | 63.9 | 7.3     |

**Table S3.** The current density at different potentials obtained from Figure S13 on (a) Cu foam, (b) Cu/SnO<sub>2</sub>, (c) A-Cu/SnO<sub>2</sub> and (d) Sn plate.

| Current density<br>(j/mA cm <sup>-2</sup> ) | Cu foam | Cu/SnO <sub>2</sub> | A-Cu/SnO <sub>2</sub> | Sn plate |
|---------------------------------------------|---------|---------------------|-----------------------|----------|
| −0.8 V vs. RHE                              | −5.7    | −3.3                | −3.7                  | −0.7     |
| −0.9 V vs. RHE                              | −10.7   | −6.3                | −7.9                  | −1.4     |
| −1.0 V vs. RHE                              | −13.4   | −11.9               | −12.9                 | −2.3     |
| −1.1 V vs. RHE                              | −18.8   | −14.4               | −16.9                 | −2.9     |
| −1.2 V vs. RHE                              | −25.3   | −19.8               | −21.0                 | −3.7     |

**Table S4.** Mass fraction and atomic fraction of Cu, Sn, O on the surface of the electrode with different deposition time of SnO<sub>2</sub> detected by SEM-EDS.

| Catalysts             | Deposition time | Wt. % |       |       | Atom % |       |       | Atom ratio of Sn:Cu |
|-----------------------|-----------------|-------|-------|-------|--------|-------|-------|---------------------|
|                       |                 | Cu    | Sn    | O     | Cu     | Sn    | O     |                     |
| Cu/SnO <sub>2</sub>   | 5               | 89.52 | 6.31  | 4.17  | 81.78  | 3.09  | 15.13 | 0.04                |
|                       | 15              | 68.46 | 22.04 | 9.5   | 58.02  | 10.01 | 31.97 | 0.17                |
|                       | 30              | 44.37 | 39.38 | 16.25 | 34.13  | 16.23 | 49.64 | 0.48                |
|                       | 45              | 13.35 | 62.08 | 24.57 | 9.26   | 23.07 | 67.67 | 2.49                |
|                       | 60              | 12.35 | 63.94 | 23.71 | 8.77   | 24.34 | 66.89 | 2.78                |
| A-Cu/SnO <sub>2</sub> | 5               | 81.91 | 5.18  | 12.9  | 60.27  | 2.04  | 37.69 | 0.03                |
|                       | 15              | 73.77 | 12.61 | 13.62 | 54.80  | 5.02  | 40.18 | 0.09                |
|                       | 30              | 52.62 | 30.24 | 17.17 | 38.41  | 11.82 | 49.77 | 0.31                |
|                       | 45              | 45.82 | 35.86 | 18.31 | 33.26  | 13.95 | 52.79 | 0.42                |
|                       | 60              | 37.91 | 41.8  | 20.29 | 26.91  | 15.90 | 57.19 | 0.59                |

## References

1. Teo, W.Z.; Ambrosi, A.; Pumera, M. Direct electrochemistry of copper oxide nanoparticles in alkaline media. *Electrochem. Commun.* **2013**, *28*, 51–53.
2. Procaccini, R.; Schreiner, W.H.; Vázquez, M.; Ceré, S. Surface study of films formed on copper and brass at open circuit potential. *Appl. Surf. Sci.* **2013**, *268*, 171–178.
3. Li, Q.; Fu, J.; Zhu, W.; Chen, Z.; Shen, B.; Wu, L.; Xi, Z.; Wang, T.; Lu, G.; Zhu, J.; Sun, S. Tuning Sn-catalysis for electrochemical reduction of CO<sub>2</sub> to CO via the core/shell Cu/SnO<sub>2</sub> structure. *J. Am. Chem. Soc.* **2017**, *139*, 4290–4293.

4. Zhao, Y.; Wang, C.; Wallace, G.G. Tin nanoparticles decorated copper oxide nanowires for selective electrochemical reduction of aqueous CO<sub>2</sub> to CO. *J. Mate. Chem. A* **2016**, *4*, 10710-10718.
